# Supplementary material for: Comprehensive Automobile Research System (CARS) – a Python-based Automobile Emissions Inventory Model
Source: Copernicus journal article supplement (doi:10.5194/gmd-2021-135), 2021-08-10
Supplement: Supplementary file 1 [file gmd-2021-135-supplement-version5.zip]

## Sheet: Sheet1
		NOX			VOC			PM2.5			CO			SOX			NH3
		CAPSS	CARS		CAPSS	CARS		CAPSS	CARS		CAPSS	CARS		CAPSS	CARS		CAPSS	CARS
	Sedan	36.1928	43.239	0.0190651	16.0706	31.25	0.328949	0.0805633	0.956	0.0992936	123.534	224.649	0.411848	0.0672655	0.0672	-0.00031383	9.86254	12.284	0.240261
	Truck	206.915	149.277	-0.155954	11.514	8.605	-0.0630392	6.1586	5.415	-0.0843403	48.3792	56.475	0.0329747	0.0818158	0.0465	-0.169319	0.087576	0.082	-0.000553257
	Bus	34.097	34.938	0.00227542	12.3656	12.659	0.00635785	0.215215	0.214	-0.000137792	6.80529	9.176	0.00965602	0.0109456	0.0108	-0.000697951	0.0138432	0.015	0.000114775
	SUV	73.5059	39.9	-0.0909287	2.38441	2.733	0.00755432	2.00753	2.167	0.0180871	21.3492	16.808	-0.0184965	0.0267103	0.0182	-0.0408021	0.0556255	0	-0.00551924
	Van	13.1205	18.012	0.013235	0.531138	1.599	0.0231414	0.301788	1.127	0.0935971	3.20253	14.777	0.0471435	0.00476447	0.0063	0.00736202	0.00686532	0.0014	-0.000542278
	Taxi	0.362616	1.217	0.00231174	0.0606348	0.273	0.00460212	0	0	0	1.1508	8.481	0.0298563	0.00716453	0.00771	0.0026152	0	0	0
	Special	2.4792	12.375	0.0267754	0.245731	0.905	0.0142869	0.0529501	0.23	0.0200813	0.830124	4.239	0.0138845	0.00175947	0.00734	0.0267555	0.00218496	0.01	0.00077542
	Motocycle	2.91148	2.836	-0.000204221	2.97303	3.16	0.0040518	0	0	0	40.2648	39.256	-0.00410908	0.0081495	0.00794	-0.00100444	0.0498275	0.049	-8.2101e-05
		369.585	301.794		46.1451	61.184		8.81665	10.109		245.516	373.861		0.208575	0.17199		10.0785	12.4414
		NOx	VOC	PM2.5	CO	NH3	SOx
	Sedan	0.0190651	0.328949	0.0992936	0.411848	-0.00031383	0.240261
	Truck	-0.155954	-0.0630392	-0.0843403	0.0329747	-0.169319	-0.000553257
	Bus	0.00227542	0.00635785	-0.000137792	0.00965602	-0.000697951	0.000114775
	SUV	-0.0909287	0.00755432	0.0180871	-0.0184965	-0.0408021	-0.00551924
	Van	0.013235	0.0231414	0.0935971	0.0471435	0.00736202	-0.000542278
	Taxi	0.00231174	0.00460212	0	0.0298563	0.0026152	0
	Special	0.0267754	0.0142869	0.0200813	0.0138845	0.0267555	0.00077542
	Motocycle	-0.000204221	0.0040518	0	-0.00410908	-0.00100444	-8.2101e-05
