# Supplementary material for: Comprehensive Automobile Research System (CARS) – a Python-based Automobile Emissions Inventory Model
Source: Copernicus journal article supplement (doi:10.5194/gmd-2021-135), 2021-08-10
Supplement: Supplementary file 1 [file gmd-2021-135-supplement.zip]

## Supplement:

The Figure and Table supplementary materials and process code "CARS\_plot\_publication.R".

Figure 2: generated by R script "CARS\_plot\_publication.R" with the input file "Total\_VKT.csv" and "numbers\_of\_vehicle.csv"

Figure 3: generated by R script "CARS\_plot\_publication.R" with four files "EmisFact\_by\_YR\_SPD.csv", "EmisFact\_by\_YR\_SPD\_25.csv", "EmisFact\_by\_YR\_SPD\_0005.csv", "EmisFact\_by\_YR\_SPD\_0\_10.csv"

Figure 4: generated by CARS\_plot\_publication with file "avgSpeedDistribution\_rev\_05\_CTWv2"

Figure 8: generated by R script "CARS\_plot\_publication.R" with the input file "CARS\_CAPSS.csv"

Figure 9: generated by R script "CARS\_plot\_publication.R" with the input file "Pollutant\_Total\_Emis\_by\_Road\_CTWv2\_SSD.csv" and "Pollutant\_Total\_Emis\_by\_Road\_CTWv2.csv"

Table 3: generated by R script "CARS\_plot\_publication.R" with the input file "Pollutant\_Total\_Emissions\_Tons\_per\_Year\_CTWv2.csv", which is form the output data of CARS. The R code can generate the annual emission file "evf\_XXX.csv" for individual species XXX. We calculated all numbers in Table 3 in excel table 3.
