# Supplementary material for: Comprehensive Automobile Research System (CARS) – a Python-based Automobile Emissions Inventory Model
Source: Copernicus journal article supplement (doi:10.5194/gmd-2021-135), 2021-08-10
Supplement: Supplementary file [file gmd-2021-135-AC1-supplement.zip]

Geosci. Model Dev. Discuss., community comment CC3  
<https://doi.org/10.5194/gmd-2021-135-CC3>, 2021  
© Author(s) 2021. This work is distributed under  
the Creative Commons Attribution 4.0 License.

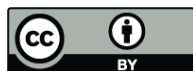

## Reply on RC1

Bok H. Baek

---

Community comment on "Comprehensive Automobile Research System (CARS) – a Python-based Automobile Emissions Inventory Model" by Bok H. Baek et al., Geosci. Model Dev. Discuss., <https://doi.org/10.5194/gmd-2021-135-CC3>, 2021

---

Dear reviewer 1,

We would like to thank you for all of your comments. We believe that it has improved our manuscript significantly. We did our best to address all of your comments and suggestions. Please review the updated manuscript and the rebuttal document attached to this post.

Please let us know if there are any further questions and looking forward to hearing back from you.

BH Baek

Please also note the supplement to this comment:

<https://gmd.copernicus.org/preprints/gmd-2021-135/gmd-2021-135-CC3-supplement.zip>
