# Supplementary material for: Comprehensive Automobile Research System (CARS) – a Python-based Automobile Emissions Inventory Model
Source: Copernicus journal article supplement (doi:10.5194/gmd-2021-135), 2021-08-10
Supplement: Supplementary file [file gmd-2021-135-AC1-supplement.zip]

Geosci. Model Dev. Discuss., chief editor comment CEC1  
<https://doi.org/10.5194/gmd-2021-135-CEC1>, 2021  
© Author(s) 2021. This work is distributed under  
the Creative Commons Attribution 4.0 License.

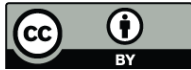

## **Comment on gmd-2021-135**

Astrid Kerkweg

---

Chief editor comment on "Comprehensive Automobile Research System (CARS) – a Python-based Automobile Emissions Inventory Model" by Bok H. Baek et al., Geosci. Model Dev. Discuss., <https://doi.org/10.5194/gmd-2021-135-CEC1>, 2021

---

Dear Authors,

following our editorial, could you please add the current version number of CARS in the title of your article upon submission of the revised version.

Best regards,

Astrid Kerkweg
