# Supplementary material for: Comprehensive Automobile Research System (CARS) – a Python-based Automobile Emissions Inventory Model
Source: Copernicus journal article supplement (doi:10.5194/gmd-2021-135), 2021-08-10
Supplement: Supplementary file [file gmd-2021-135-AC1-supplement.zip]

Geosci. Model Dev. Discuss., community comment CC1  
<https://doi.org/10.5194/gmd-2021-135-CC1>, 2021  
© Author(s) 2021. This work is distributed under  
the Creative Commons Attribution 4.0 License.

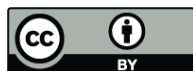

## Reply on CEC1

Bok H. Baek

---

Community comment on "Comprehensive Automobile Research System (CARS) – a Python-based Automobile Emissions Inventory Model" by Bok H. Baek et al., Geosci. Model Dev. Discuss., <https://doi.org/10.5194/gmd-2021-135-CC1>, 2021

---

Absolutely, we will add the version of CARS to the title of this manuscript when we submit the revised version. The new title will be "Comprehensive Automobile Research System (CARS) version 1.0 – a Python-based Automobile Emissions Inventory Model"

Thank you for your comment.

BH
